# Supplementary material
Source: ML conference proceedings conference paper supplement (https://openreview.net/forum?id=rF60QaM3-QU)
Supplement: supplementary_material [file attachment]

Table 1: A comparison between fixed reinforcement learning algorithms (REINFORCE), backpropagation-based meta RL (MAML, MetaGenRL, LPG), black-box (MetaRNN), and our black-box method with symmetries (SymLA).  $\pi_\theta^{(s)}$  denotes a *stationary* policy that is updated at fixed intervals by backpropagation.

|                                  | REINFORCE                         | MetaGenRL / LPG                          | MAML                              | MetaRNN       | SymLA (ours)              |
|----------------------------------|-----------------------------------|------------------------------------------|-----------------------------------|---------------|---------------------------|
| Meta variables                   | /                                 | $\phi$                                   | Initial $\theta_0$                | $\theta$      | $\theta$                  |
| Learned variables                | $\theta$                          | $\theta$                                 | $\theta$                          | RNN state $h$ | RNN states $h_{ab}^{(k)}$ |
| Learning algorithm               | fixed loss func $L$<br>+ Backprop | learned loss func $L_\phi$<br>+ Backprop | fixed loss func $L$<br>+ Backprop | $\pi_\theta$  | $\pi_\theta$              |
| Policy                           | $\pi_\theta^{(s)}$                | $\pi_\theta^{(s)}$                       | $\pi_\theta^{(s)}$                | $\pi_\theta$  | $\pi_\theta$              |
| Black box                        | $\times$                          | $\times$                                 | $\times$                          | $\checkmark$  | $\checkmark$              |
| Symmetries in learning algorithm | $\checkmark$                      | $\checkmark$                             | ( $\checkmark$ )                  | $\times$      | $\checkmark$              |

## A Related Work

Learning to reinforcement learn can be implemented with varying degrees of inductive biases.

**Black-Box Meta RL** Black-box meta RL can be implemented by policies that receive the reward signal as input [Schmidhuber, 1992b] and use memory to learn, such as recurrence in RNNs [Hochreiter et al., 2001, Wang et al., 2016, Duan et al., 2016]. These approaches do not feature the symmetries discussed in this paper which leads to a tendency of overfitting.

**Learned Learning Rules & Fast Weights** In the supervised and reinforcement learning contexts, learned learning rules [Bengio et al., 1992] or fast weights [Schmidhuber, 1992a, 1993, Miconi et al., 2018, Schlag et al., 2020, Najarro and Risi, 2020] describe (meta-)learned mechanisms (slow weights) that update fast weights to implement learning. This often involves outer-products and can be generalised to black-box meta learning with parameter sharing [Kirsch and Schmidhuber, 2020]. None of these approaches feature all of the symmetries we discuss above and are applicable to RL.

**Backpropagation-based Meta RL** Alternatives to black-box meta RL include learning a weight initialization and adapting it with a human-engineered RL algorithm [Finn et al., 2017], warping computed gradients [Flennerhag et al., 2019], meta-learning hyper-parameters [Sutton, 1992, Xu et al., 2018] or meta-learning objective functions corresponding to the learning algorithm [Houthoofd et al., 2018, Bechtle et al., 2021, Kirsch et al., 2019, Xu et al., 2020, Oh et al., 2020].

**Neural Network Symmetries** Symmetries in neural networks have mainly been investigated to reflect the structure of the input data. This includes applications of convolutions [Fukushima, 1979], deep sets [Zaheer et al., 2017], graph neural networks [Wu et al., 2020], and geometric deep learning [Bronstein et al., 2017]. While many meta learning algorithms exhibit symmetries [Bengio et al., 1992], in particular backpropagation-based meta learning [Andrychowicz et al., 2016, Finn et al., 2017, Flennerhag et al., 2019, Kirsch et al., 2019], the effects of these symmetries have not been discussed in detail. In this work, we provide such a discussion and experimental investigation in the context of meta RL.

## B Bandits from Wang et al. [2016]

In our experiments, we use bandits of varying difficulty from Wang et al. [2016]. Let  $p_1$  be the probability of the first arm for a payout of  $r = 1$ ,  $r = 0$  otherwise, and  $p_2$  the payout for the second arm. Then, we define the

- uniform independent bandit with  $p_1 \sim U[0, 1]$  and  $p_2 \sim U[0, 1]$ ,
- uniform dependent bandit with  $p_1 \sim U[0, 1]$  and  $p_2 = 1 - p_1$ ,
- easy dependent bandit with  $p_1 \sim \text{Cat}[0.1, 0.9]$  and  $p_2 = 1 - p_1$ ,
- medium dependent bandit with  $p_1 \sim \text{Cat}[0.25, 0.75]$  and  $p_2 = 1 - p_1$ ,
- hard dependent bandit with  $p_1 \sim \text{Cat}[0.4, 0.6]$  and  $p_2 = 1 - p_1$ .

---

**Algorithm 1** SymLA meta training

---

**Require:** Distribution over RL environment(s)  $p(e)$   
 $\theta \leftarrow$  initialize LSTM parameters  
**while** meta loss has not converged **do**  $\triangleright$  Outer loop in parallel over envs  $e \sim p(e)$  and samples  
 $\phi \sim \mathbb{N}(\phi|\theta, \Sigma)$   
 $\{h_{ab}\} \leftarrow$  initialize LSTM states  $\forall a, b$   
 $o_1 \sim p(o_1)$   $\triangleright$  Initialize environment  $e$   
**for**  $t \in \{1, \dots, L\}$  **do**  $\triangleright$  Inner loop over lifetime in environment  $e$   
 $h_{ab} \leftarrow f_{\text{LSTM}}(h_{ab}, o_{t,a}, a_{t-1,b}, r_{t-1}, \vec{m}_b, \overleftarrow{m}_a) \quad \forall a, b$   $\triangleright$  Equation 8  
 $\vec{m}_b \leftarrow \sum_a f_{\vec{m}}(h_{ab}) \quad \forall b$   $\triangleright$  Create forward messages  
 $\overleftarrow{m}_a \leftarrow \sum_b f_{\overleftarrow{m}}(h_{ab}) \quad \forall a$   $\triangleright$  Create backward messages  
 $y \leftarrow \vec{m}_{\cdot 1}$   $\triangleright$  Read out action  
 $a_t \sim p(a_t; y)$   $\triangleright$  Sample action from distribution parameterized by  $y$   
Send action  $a_t$  to environment  $e$ , observe  $o_{t+1}$  and  $r_t$   
 $\theta \leftarrow \theta + \alpha \nabla_{\theta} \mathbb{E}_{\phi \sim \mathbb{N}(\phi|\theta, \Sigma)} [\mathbb{E}_{e \sim p(e)} [\sum_{t=1}^L r_t^{(e)}(\phi)]]$   $\triangleright$  Update  $\theta$  using evolution strategies  
(Equation 9)

---

## 458 C Hyper-parameters

### 459 C.1 SymLA Architecture

460 We use a single recurrent layer,  $K = 1$ , with a message size of  $\overleftarrow{M} = 8$  and  $\vec{M} = 8$ . To produce  
461 the next state  $h_{ab}$  according to Equation 8, we use parameter-shared LSTMs with a hidden size of  
462  $N = 16$  ( $N = 64$  for bandits to match Wang et al. [2016]) and run the recurrent cell for 2 micro  
463 ticks.

### 464 C.2 Meta Learning / Outer Loop

465 We estimate gradients  $\nabla_{\theta}$  using evolutionary strategies [Salimans et al., 2017] with 10 evaluations  
466 per population sample to estimate the fitness value (100 evaluations for bandits). Then, we apply  
467 those using Adam with a learning rate of  $\alpha = 0.01$ ,  $\beta_1 = 0.9$ , and  $\beta_2 = 0.999$  ( $\alpha = 0.2$  for bandits).  
468 We use a fixed noise standard deviation of  $\sigma = 0.035$  ( $\sigma = 0.2$  for bandits) and a population size of  
469 512. Our inner loop has a length of  $L = 500$  ( $L = 100$  for bandits), concatenating multiple episodes.  
470 We meta-optimize for 4,000 outer steps for bandit experiments, and 20,000 otherwise.

### 471 C.3 Generalisation to Unseen Environments

472 We apply a random linear transformation (Glorot normal) to environment observations, mapping  
473 those to a 16-dimensional vector.
